# Supplementary material for: Heterozygous NFKB1 variant causes inflammatory dysregulation shaped by broader genetic context in common variable immunodeficiency
Source: JCI journal article supplement (doi:10.1172/jci.insight.198703), 2026-03-23

Data for Figure 4C. p50/p105 Replicate Blot 1 (Including densitometry boxes and signal values)

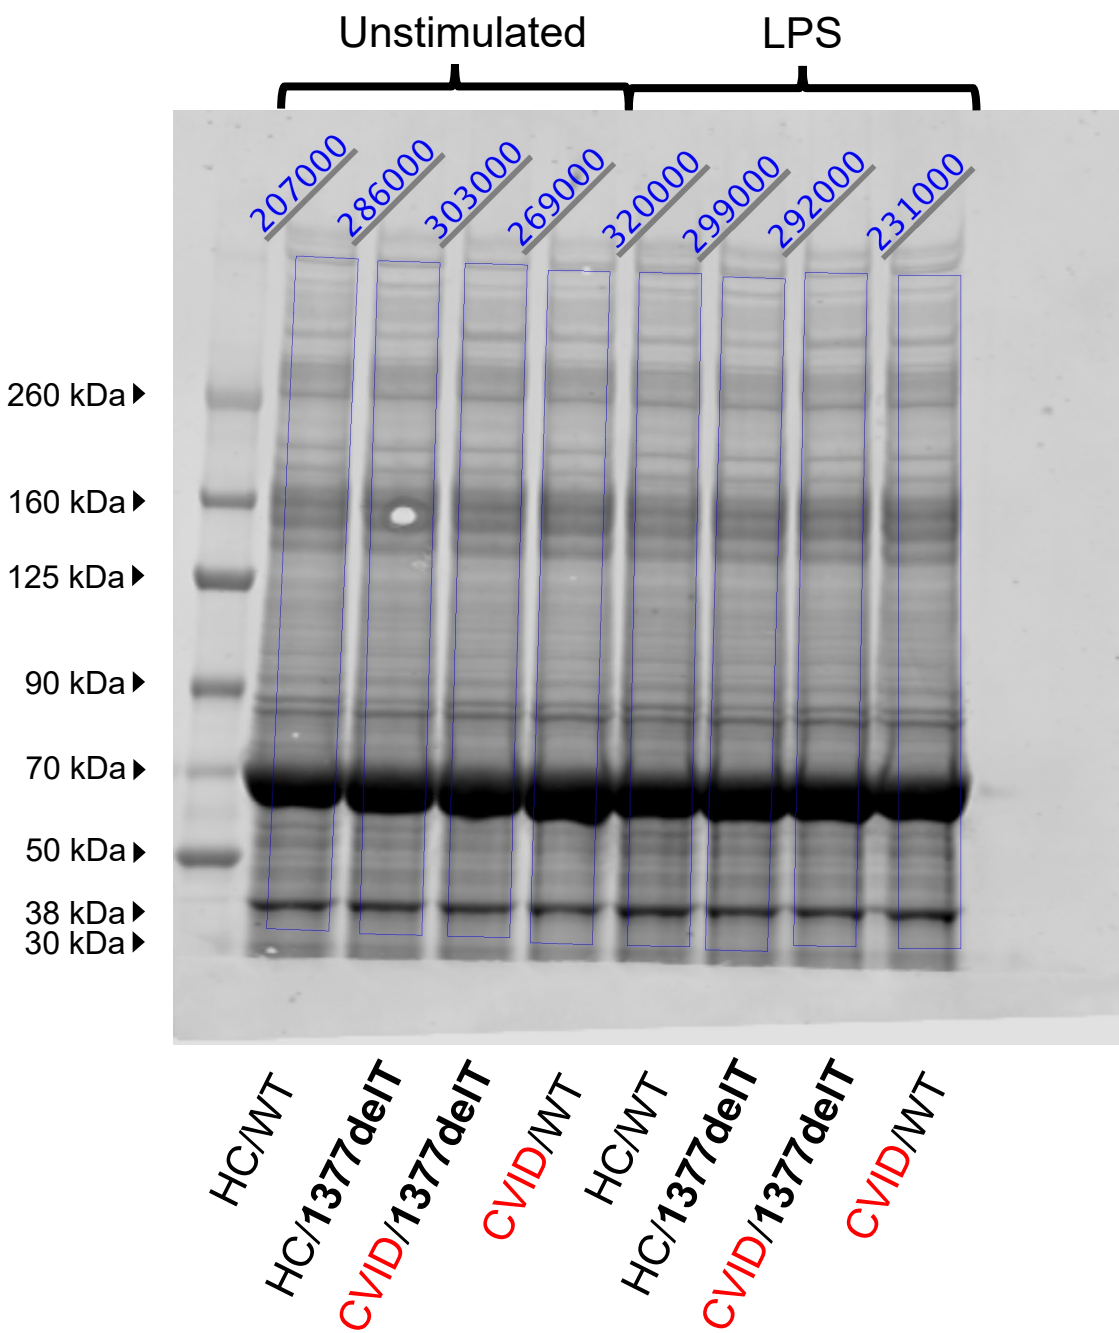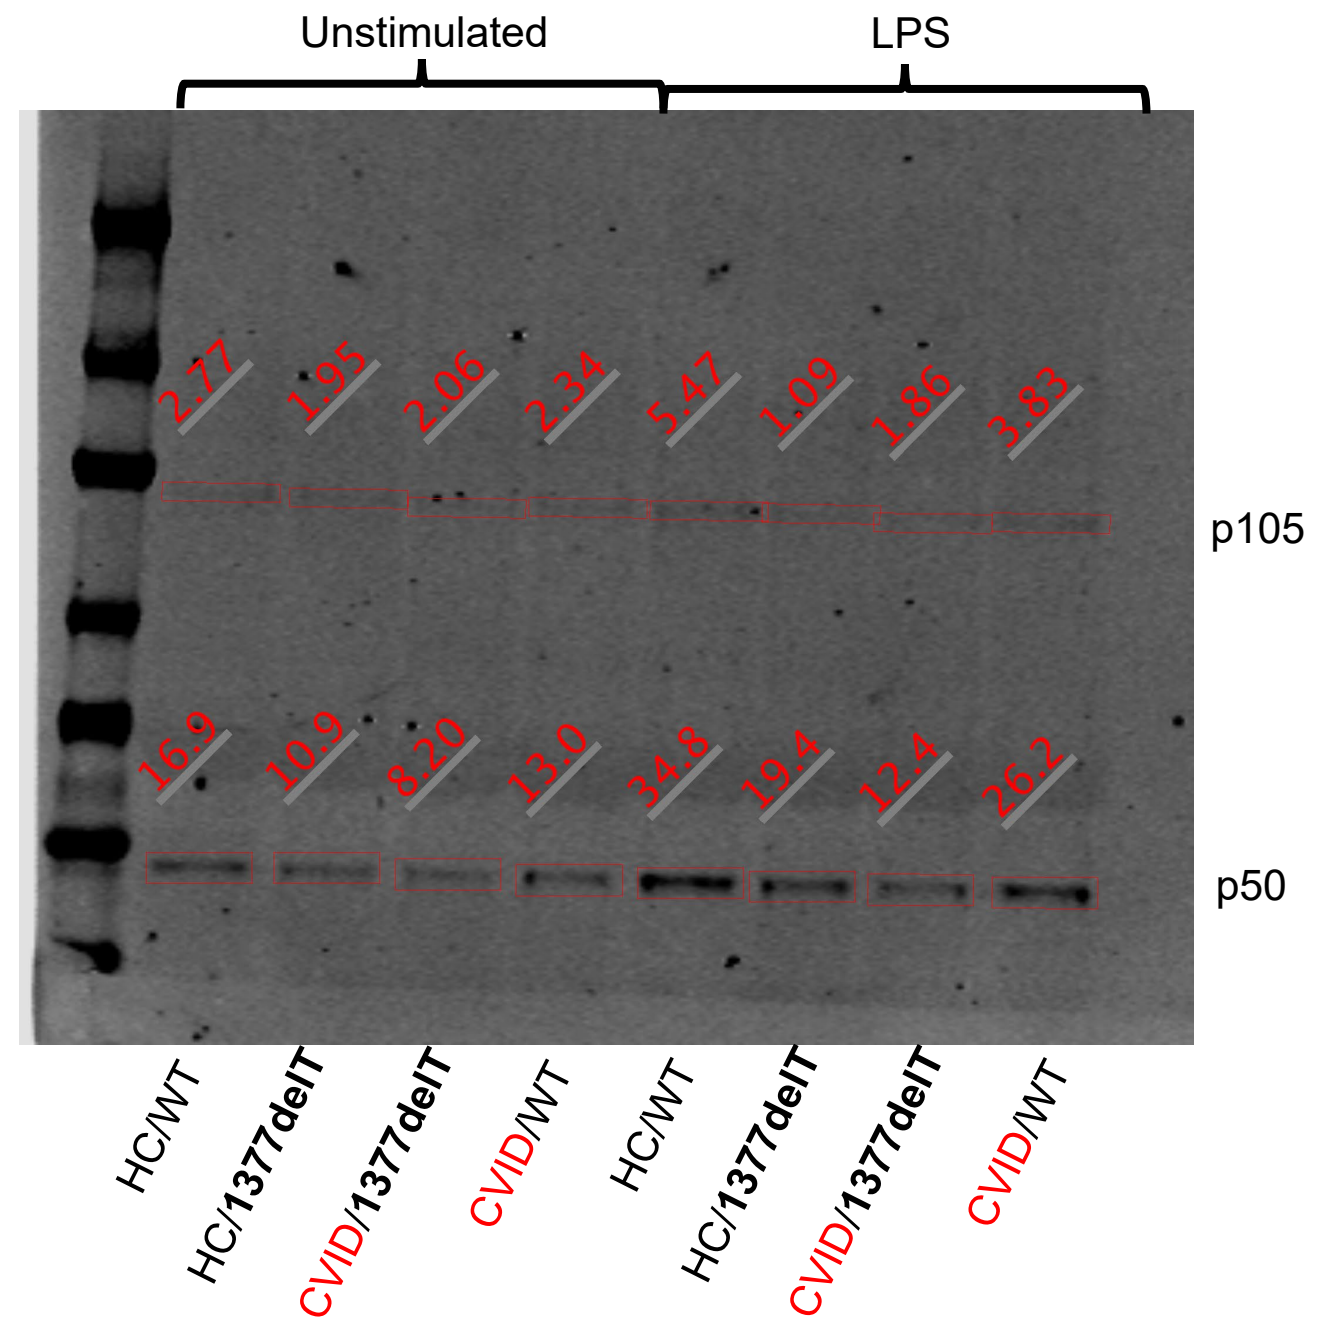

Data for Figure 4C. p50/p105 Replicate Blot 2 (Including densitometry boxes and signal values)

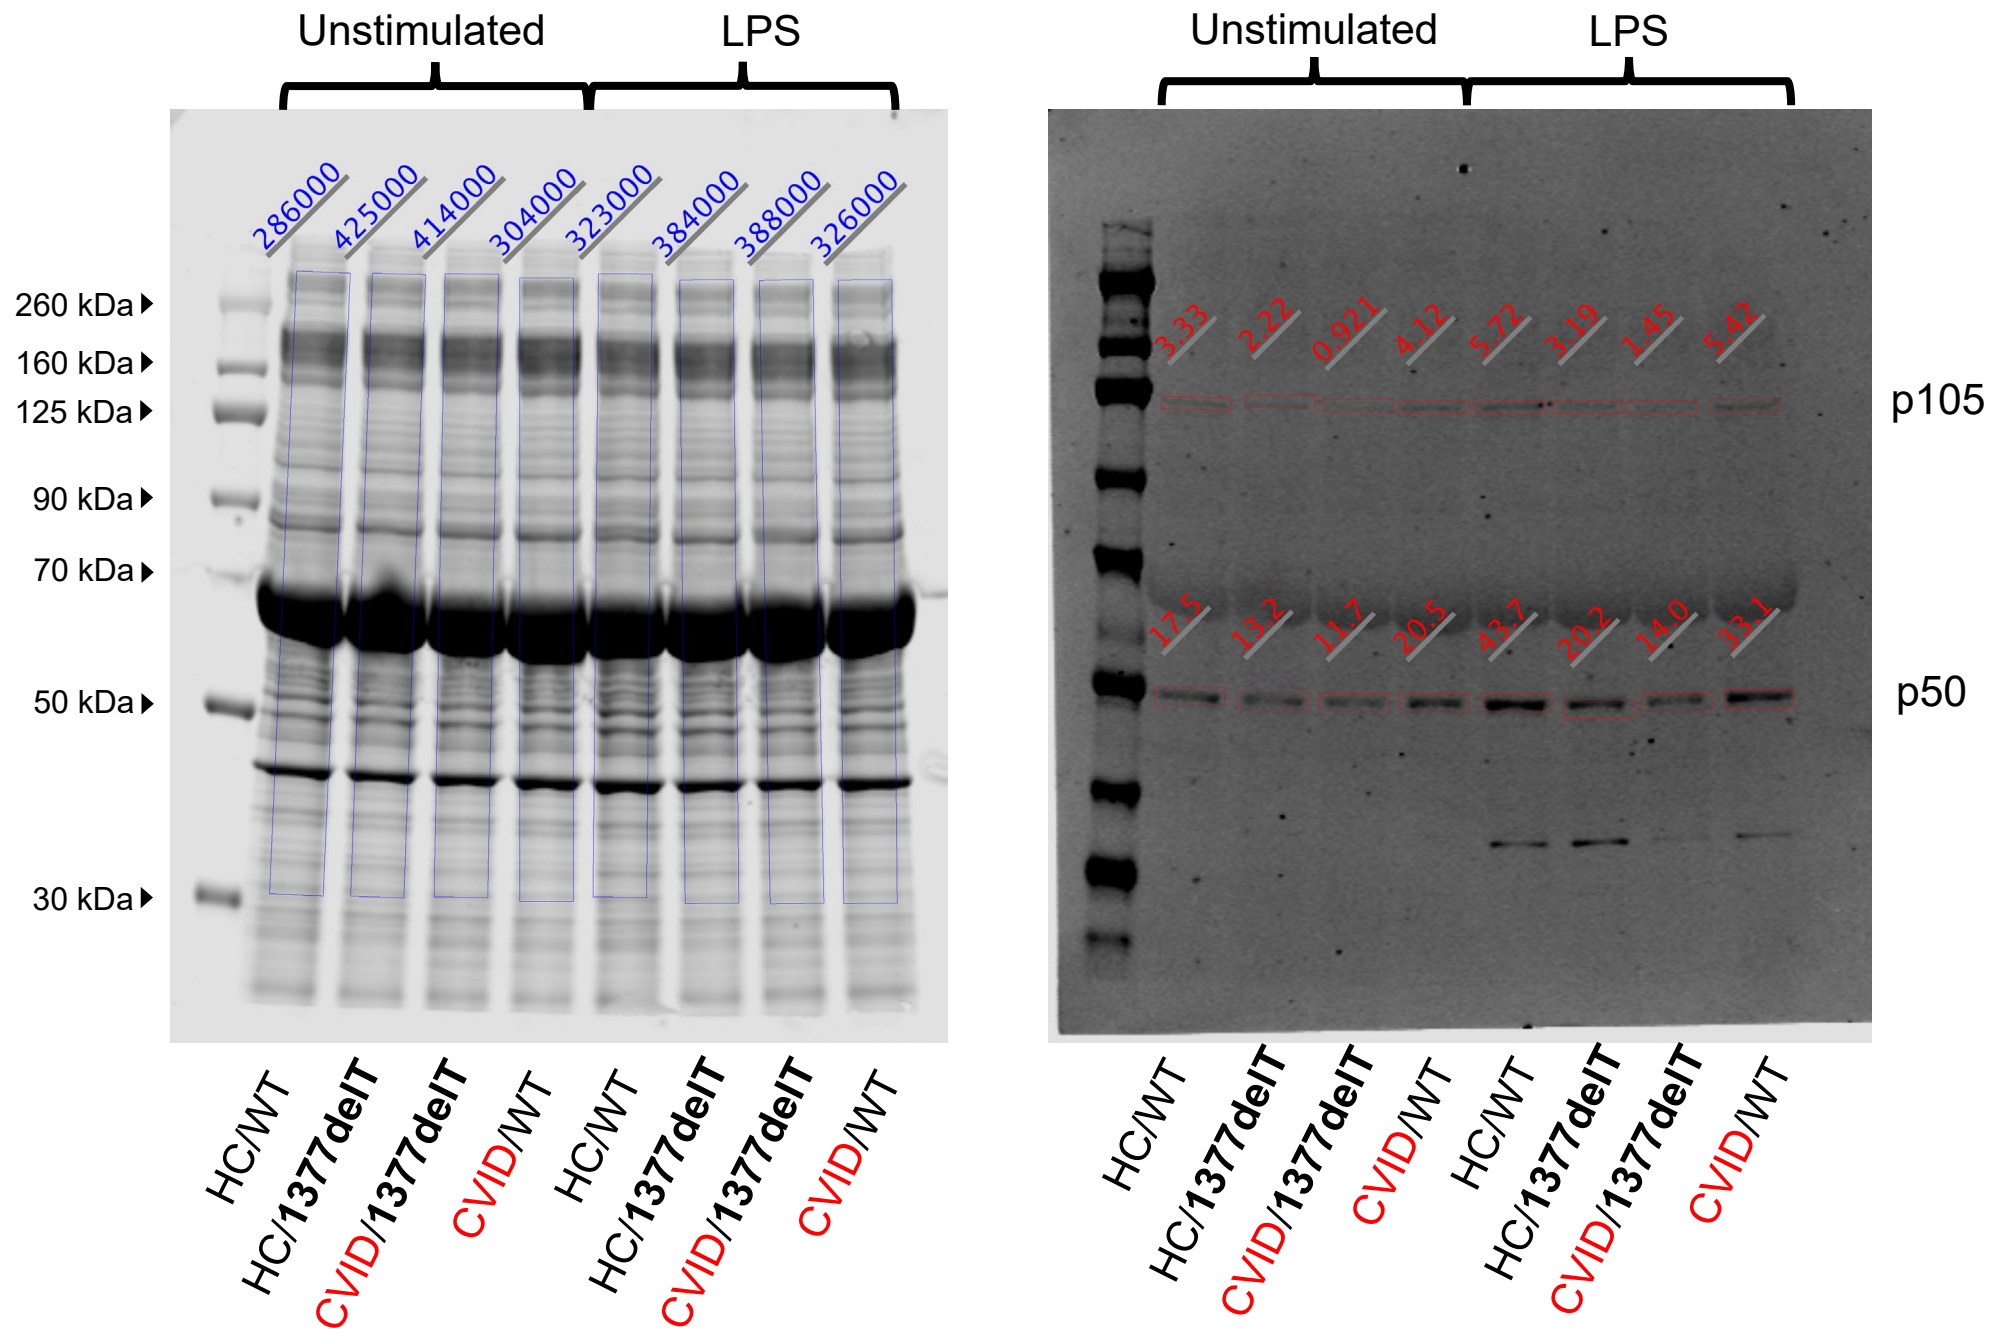

Data for Figure 4C. p50/p105 Replicate Blot 3 (Including densitometry boxes and signal values)

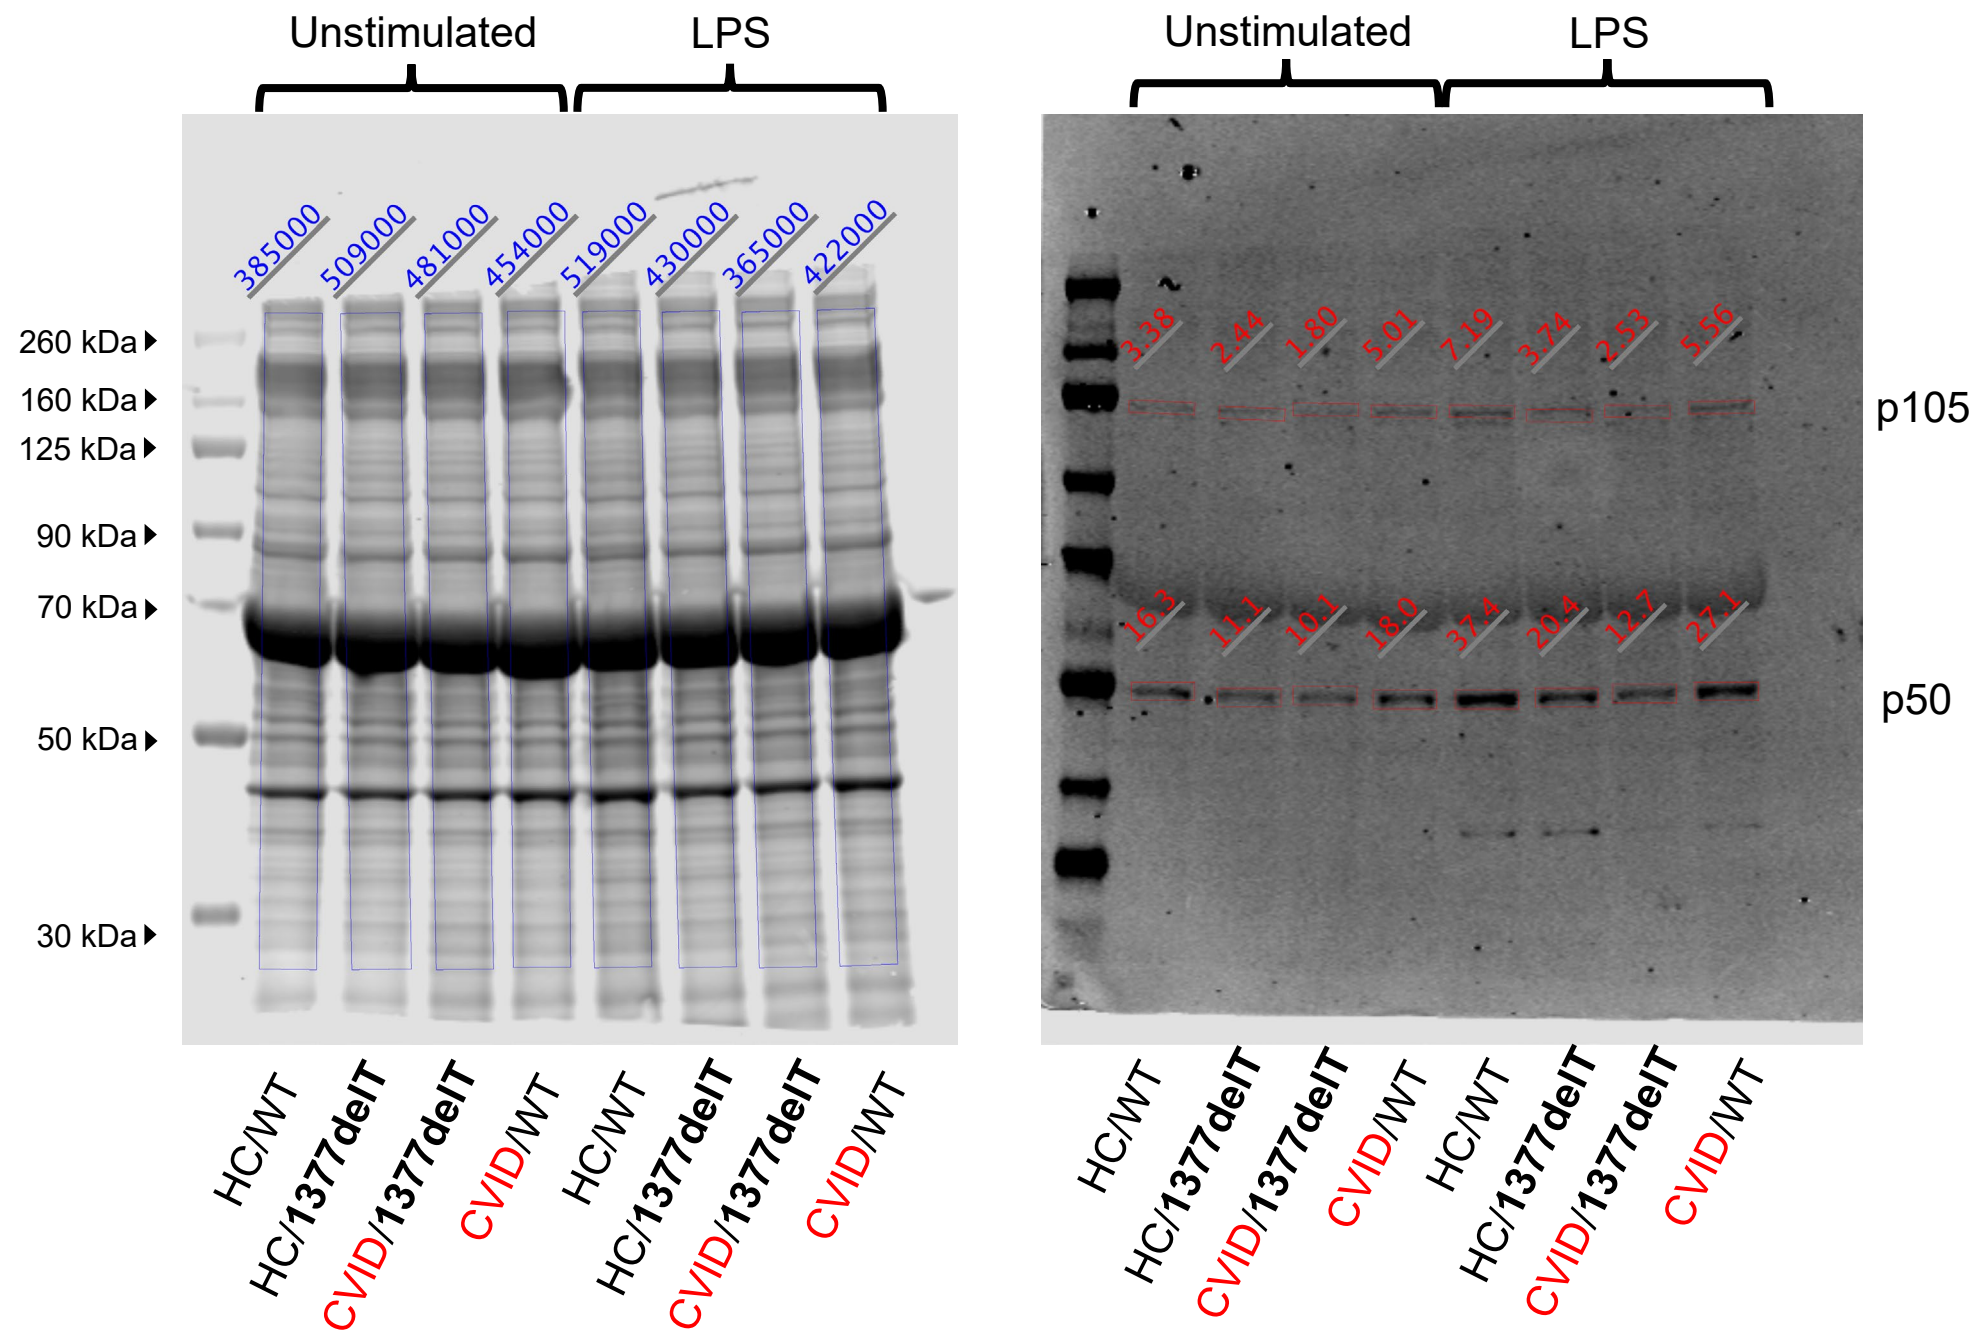

Supplementary Figure 3A Data  
p105

PBMC  
cytosolic fraction

1377delT    928-2A>G  
                  intronic    348delA

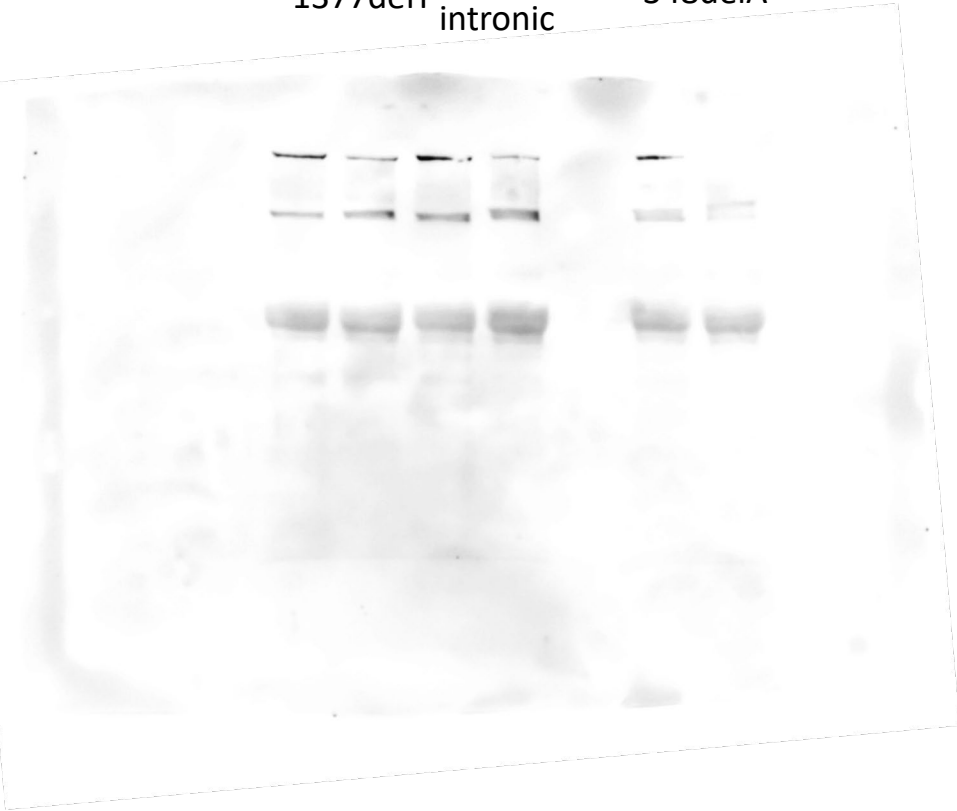

CVID    HD1    HD2

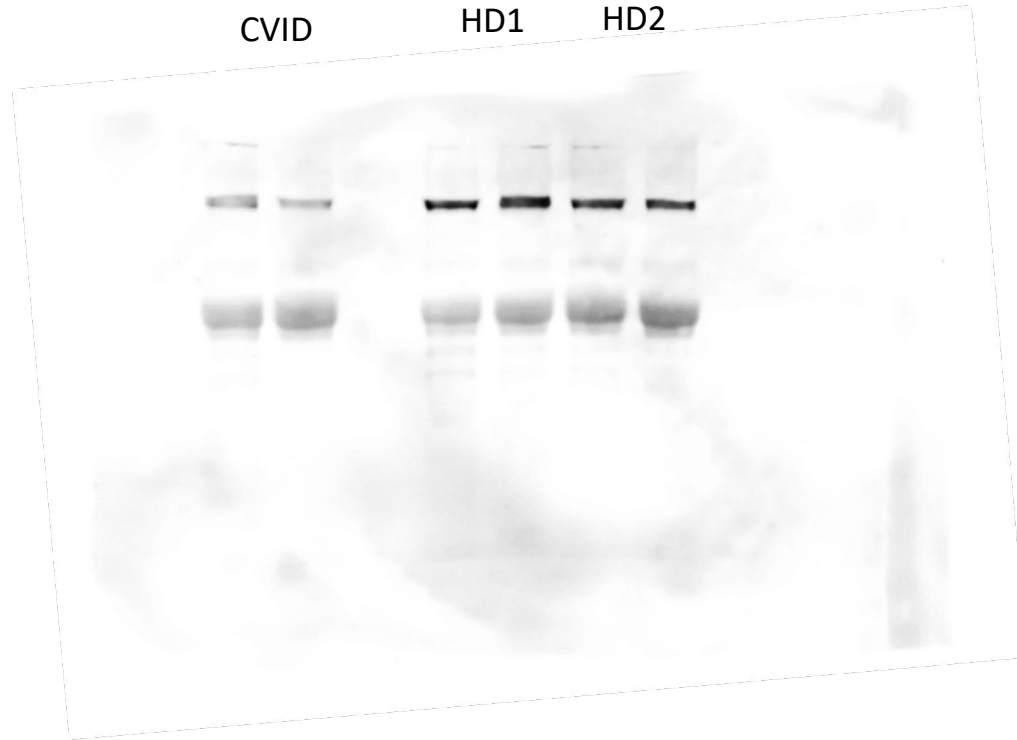

Supplementary Figure 3A Data  
Phospho-p105

PBMC  
cytosolic fraction

928-2A>G  
1377delT intronic 348delA

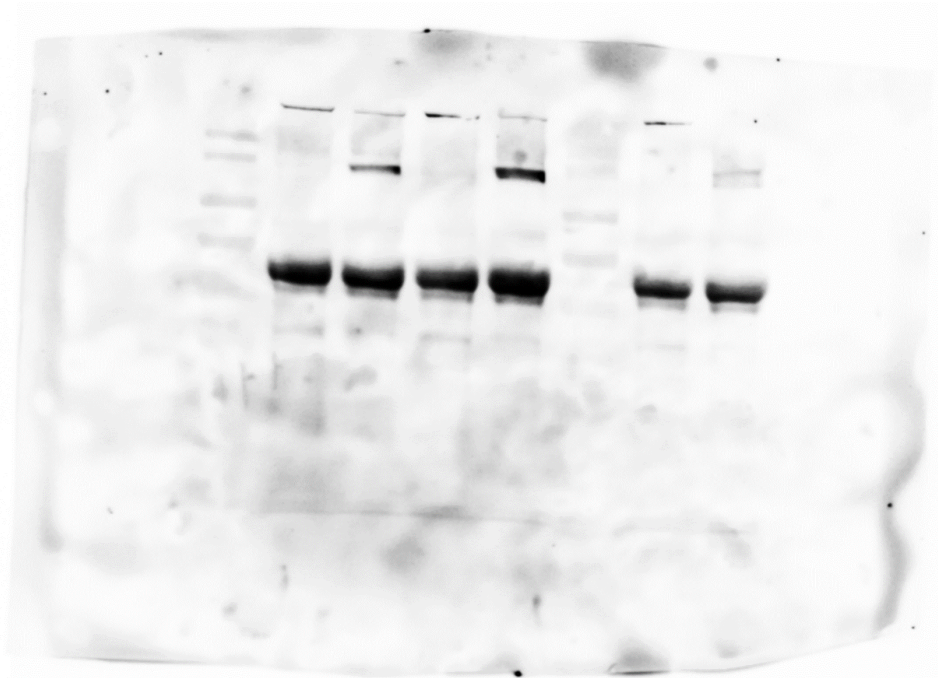

CVID HD1 HD2

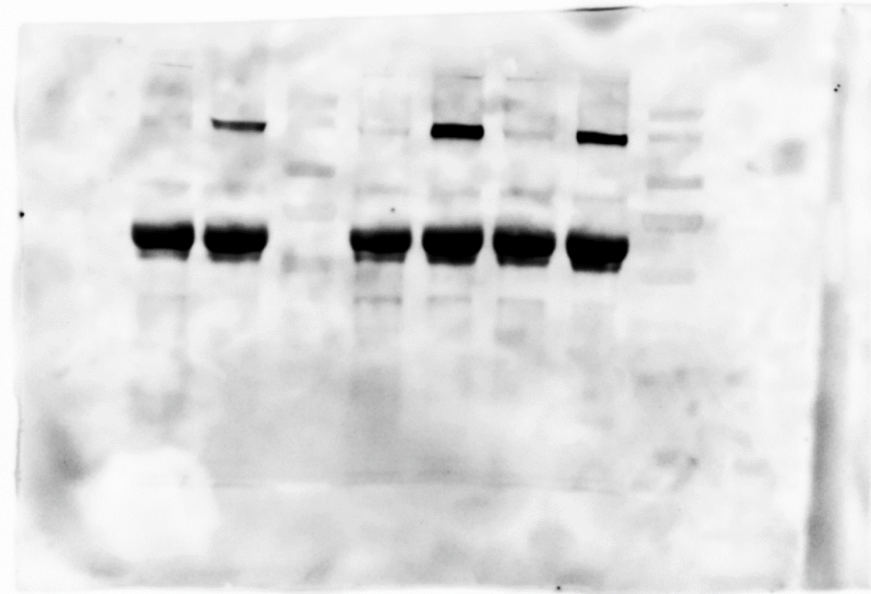

Supplementary Figure 3A Data  
GAPDH

PBMC  
cytosolic fraction

1377delT    928-2A>G intronic    348delA

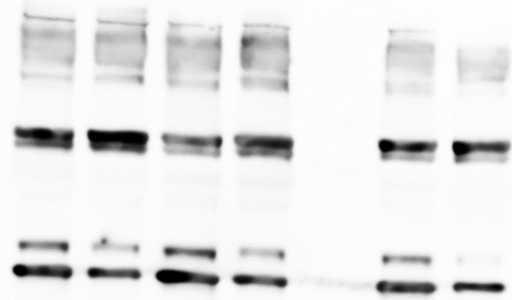

CVID    HD1    HD2

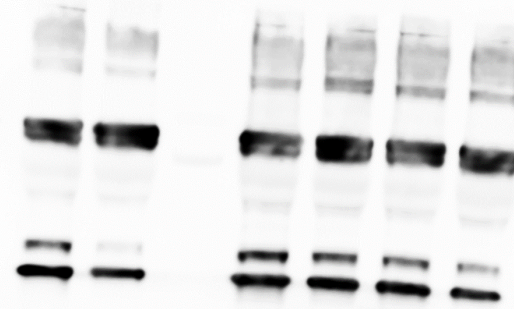

Supplementary Figure 3A Data  
p50 (p105/p50)

PBMC  
nuclear fraction

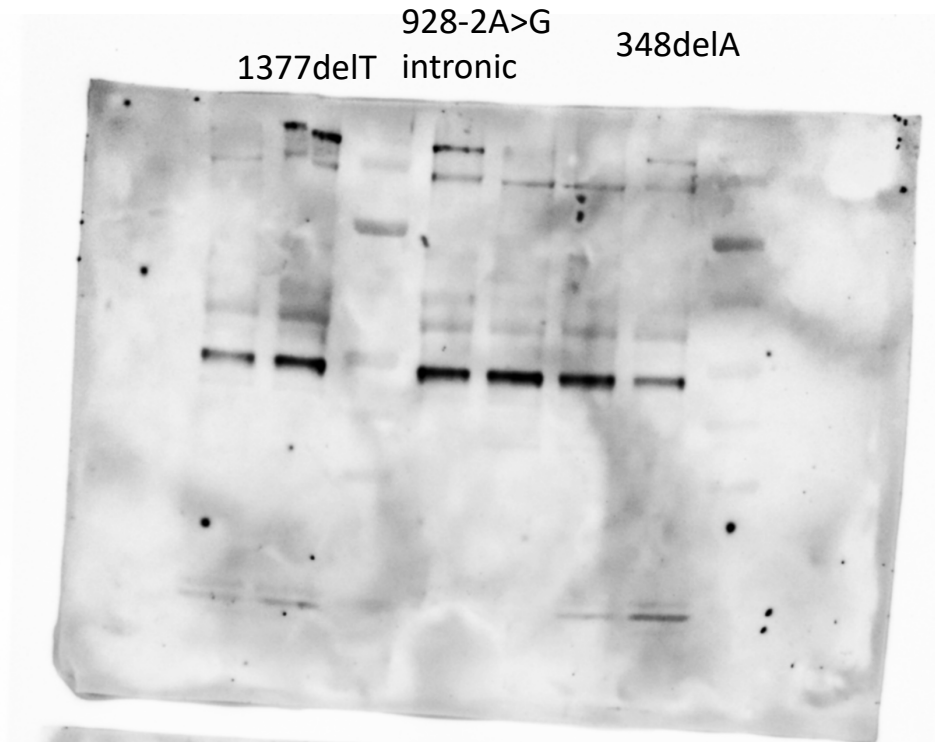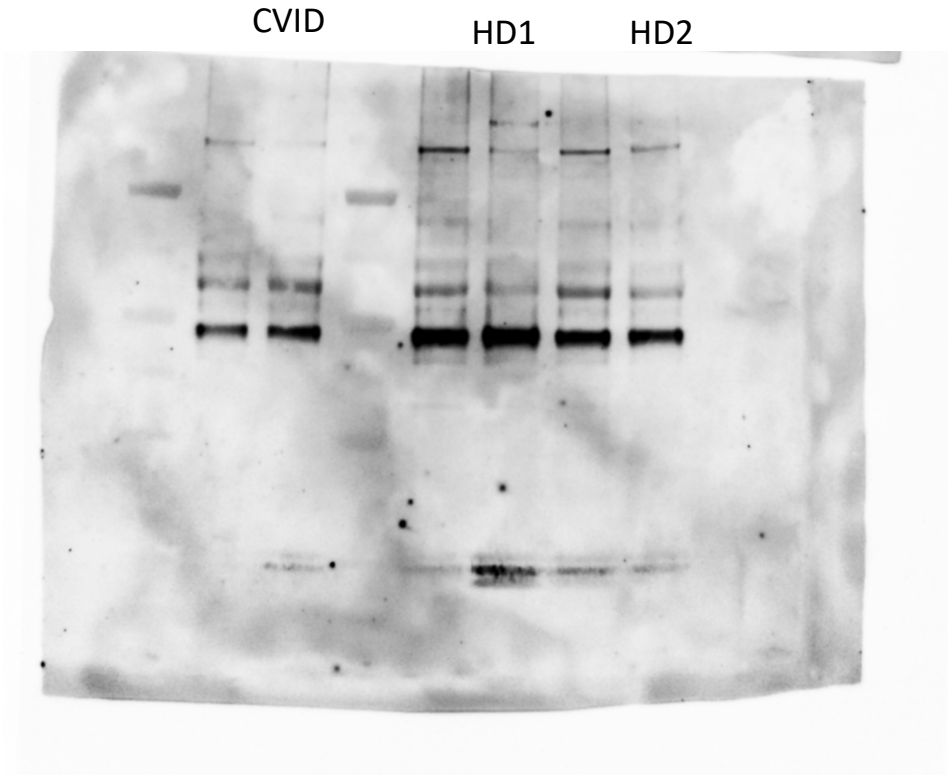

Supplementary Figure 3A Data  
GAPDH

PBMC  
nuclear fraction

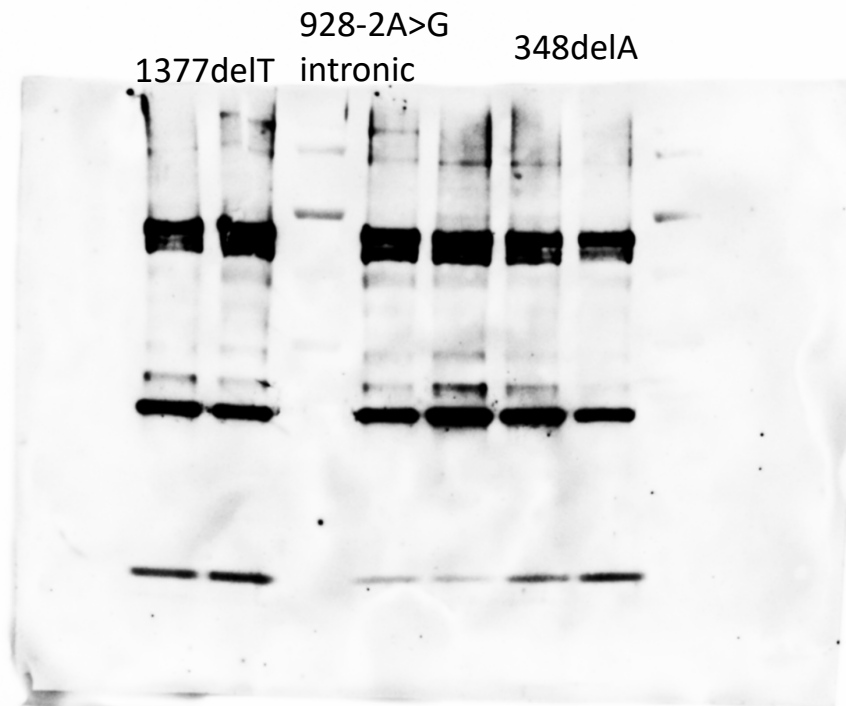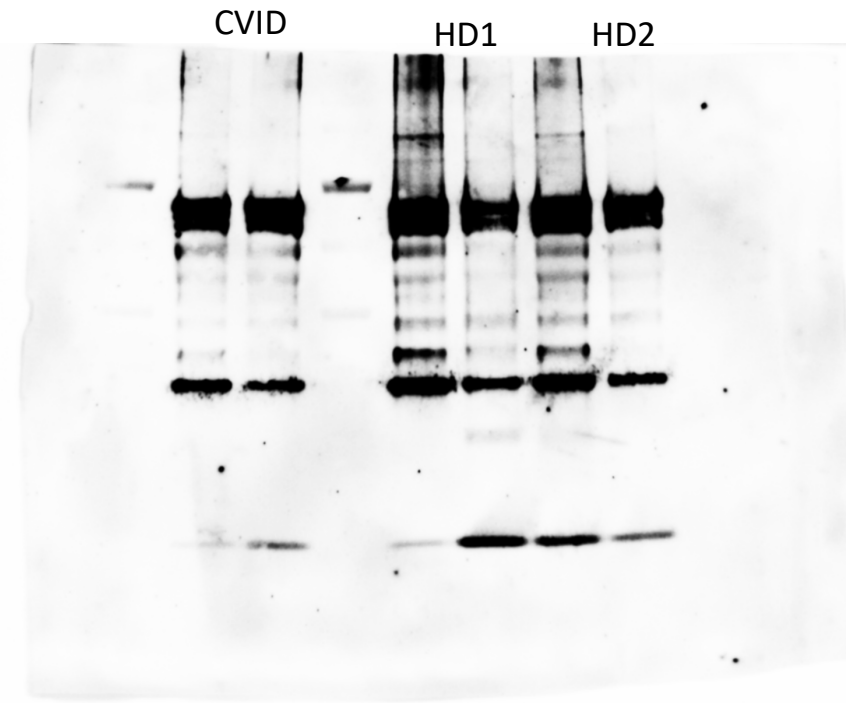

Supplement: sd2 [file 2]
